# Supplementary material for: Chronic inflammation is associated with neural responses to faces in bangladeshi children
Source: PubMed Central journal article supplement (PMC6853162; doi:10.1016/j.neuroimage.2019.116110), 2019-11-15

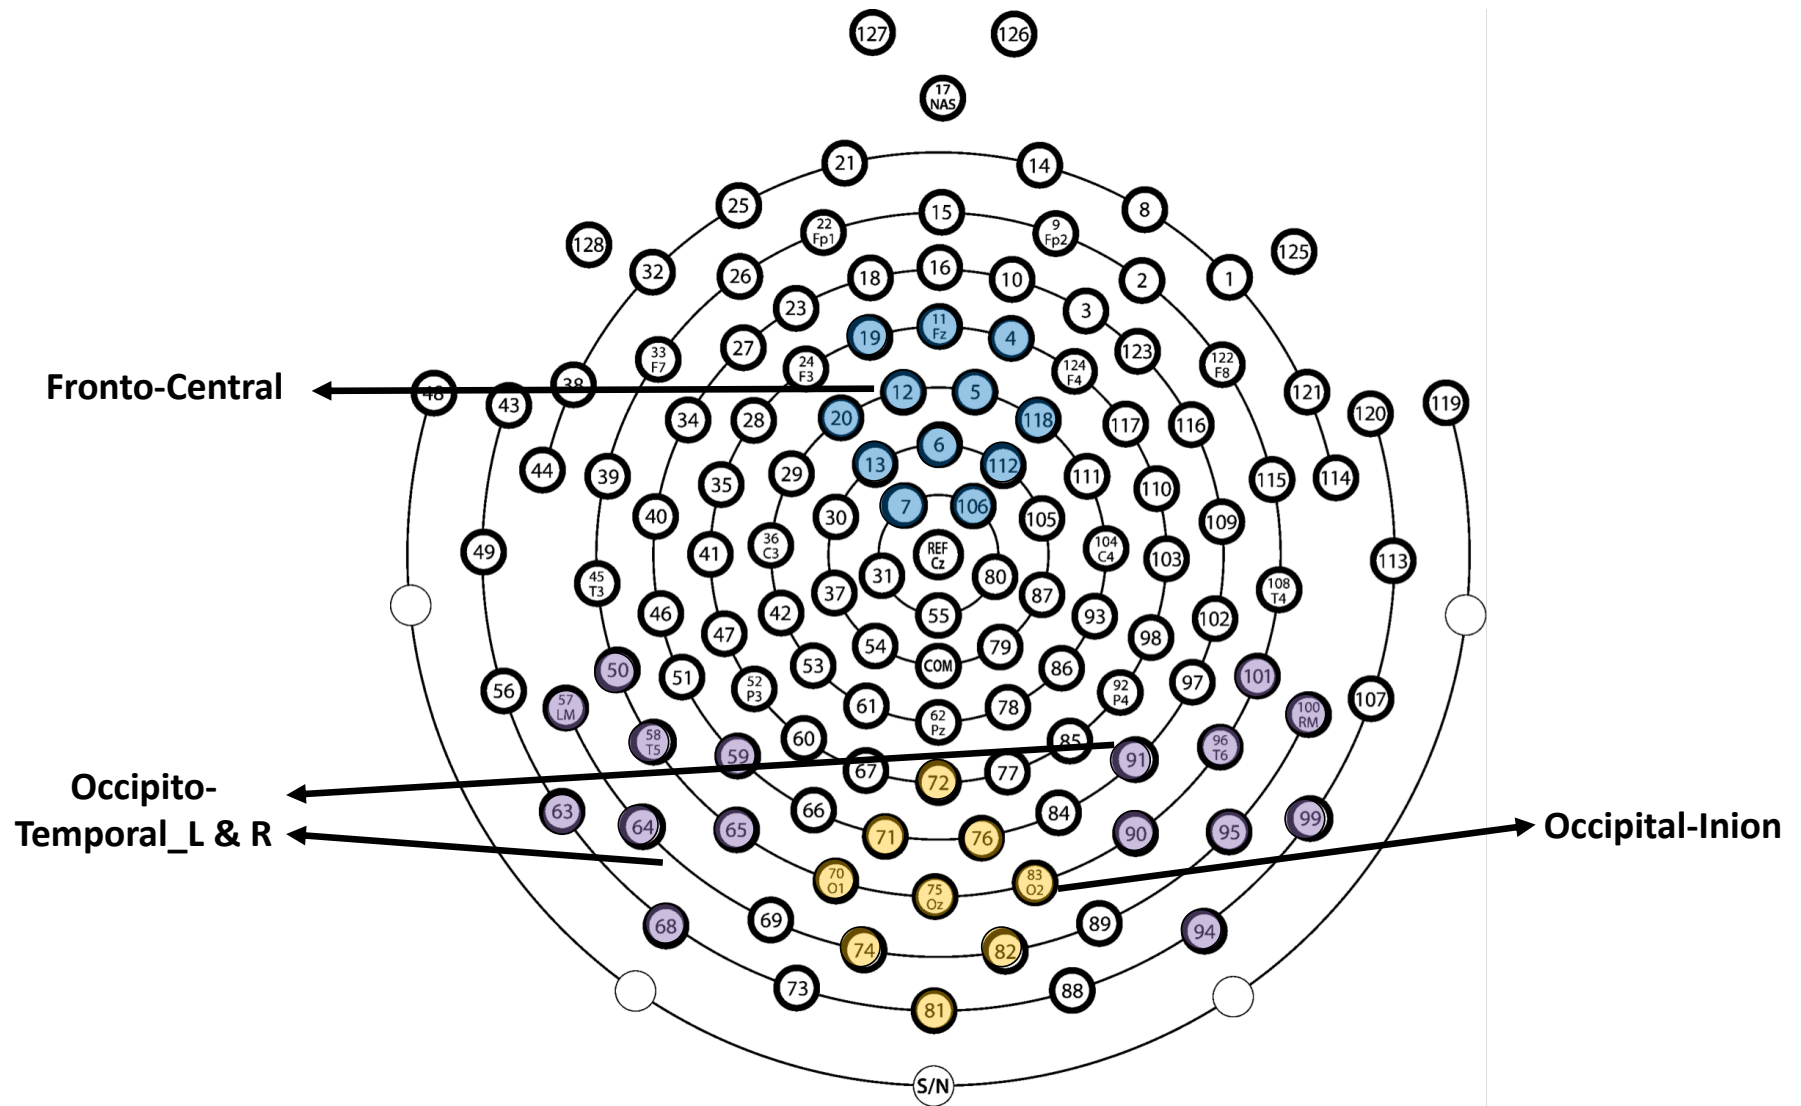

Supplement: mmc1.pdf [file mmc1.pdf]
